# Supplementary material
Source: ML conference proceedings conference paper supplement (https://proceedings.mlr.press/v231/faber24a.html)

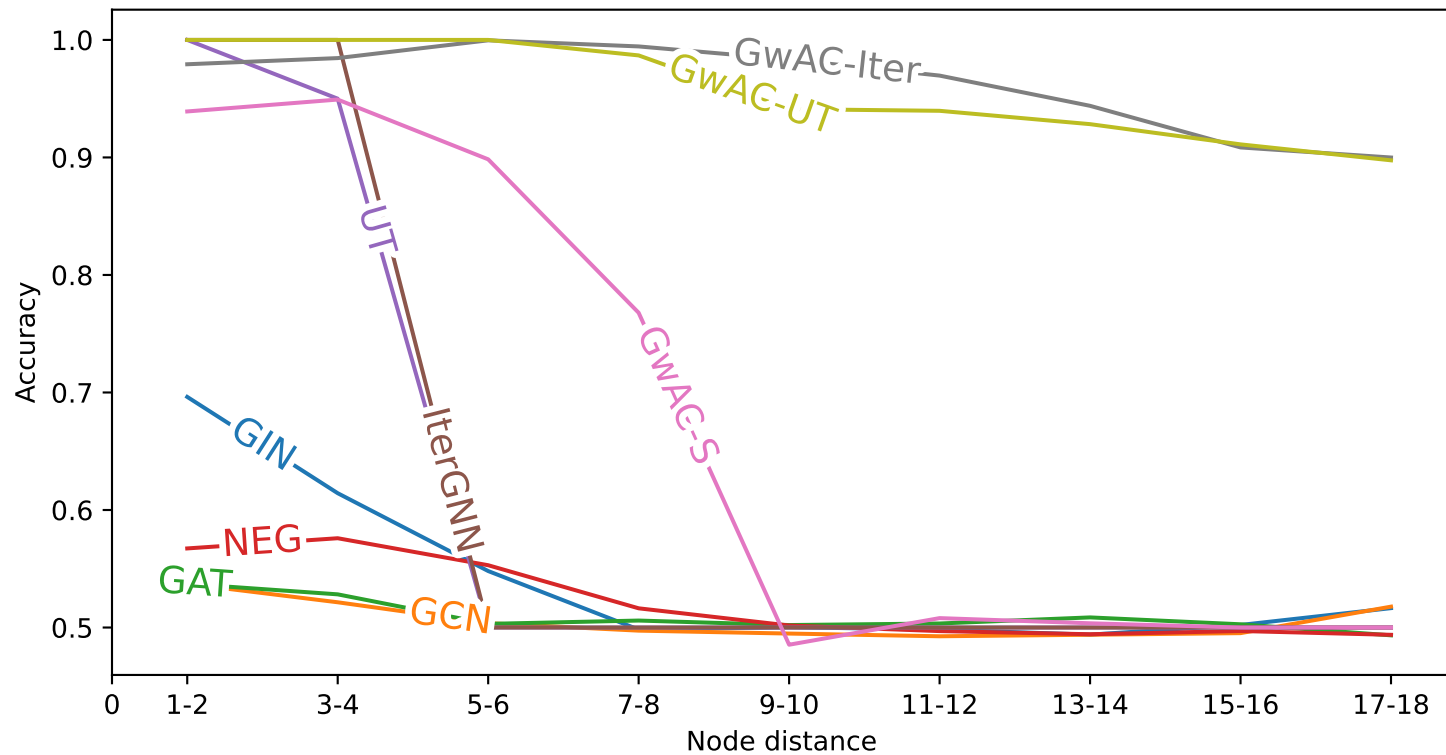

Supplement: Supplementary file 1 [file faber24a-supp.zip]

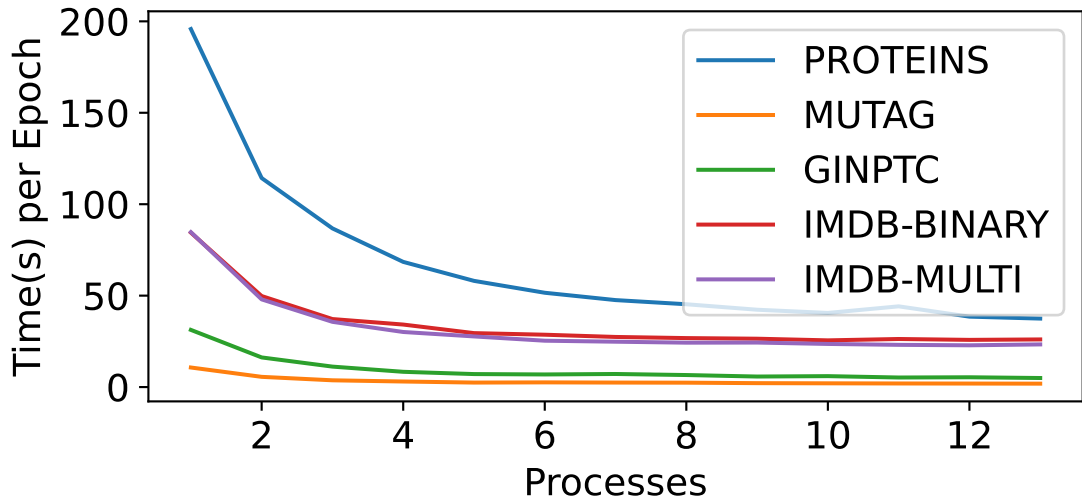

Supplement: Supplementary file 2 [file faber24a-supp.zip]

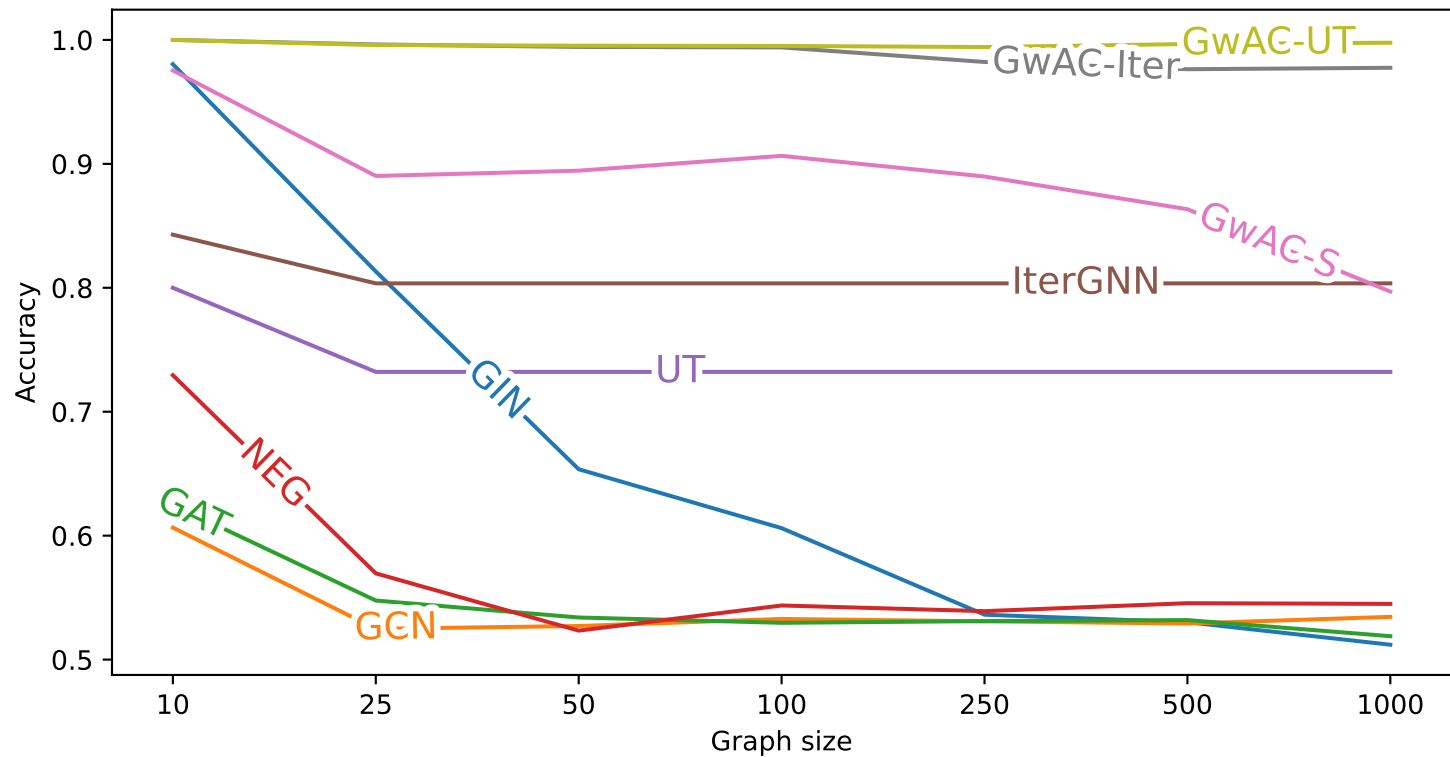

Supplement: Supplementary file 3 [file faber24a-supp.zip]

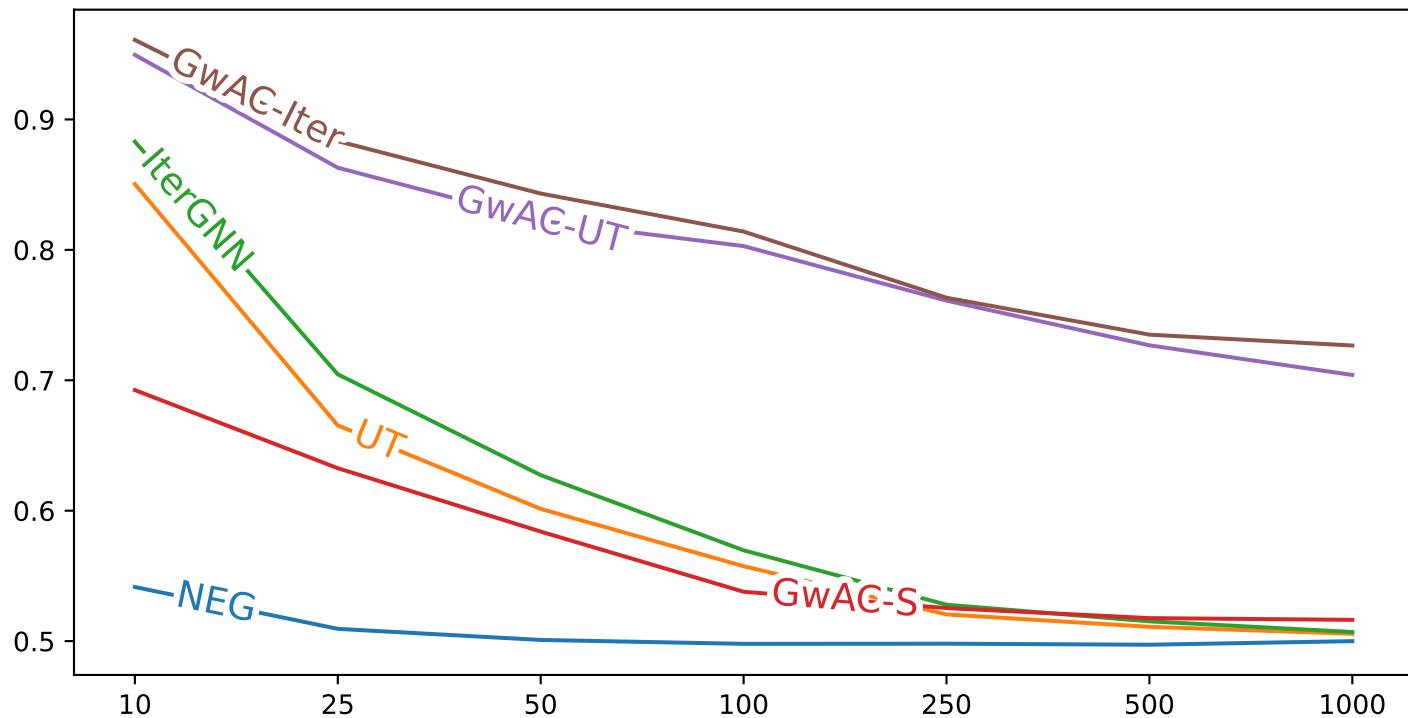

Supplement: Supplementary file 4 [file faber24a-supp.zip]

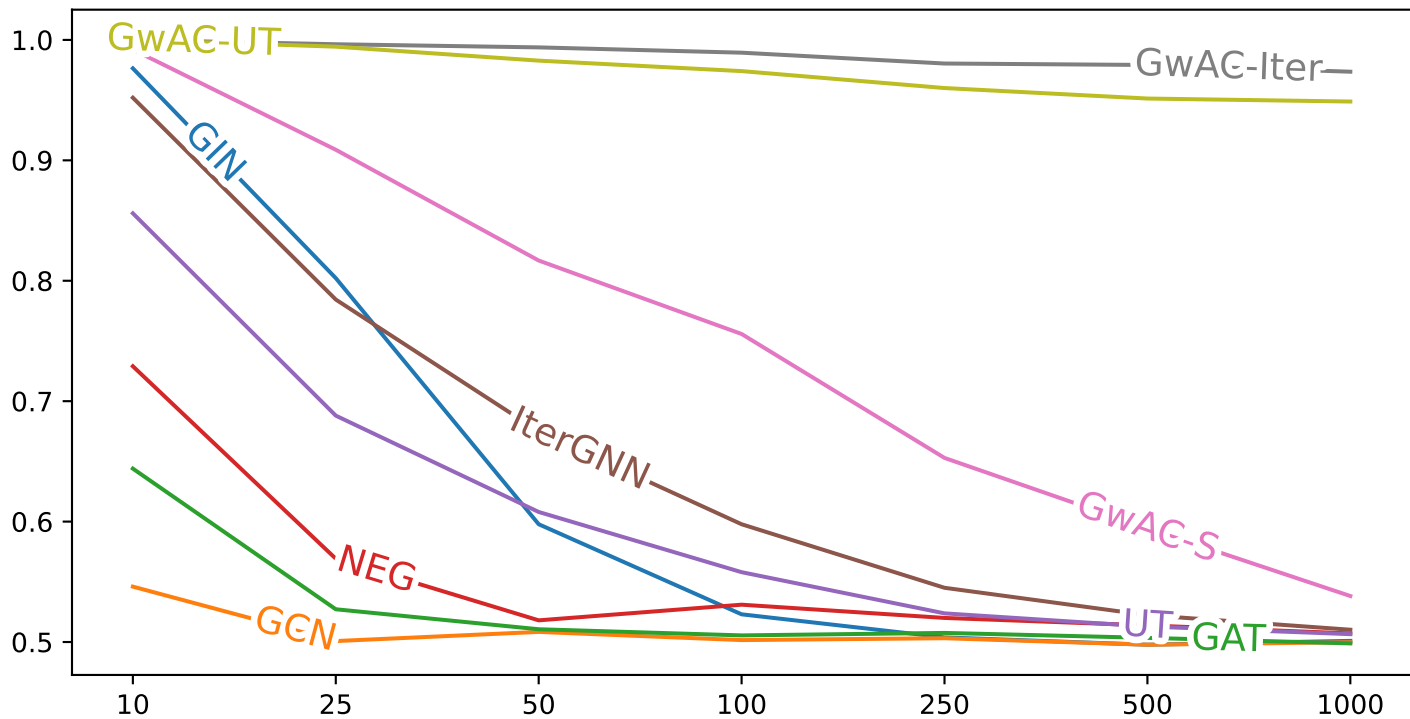

Supplement: Supplementary file 5 [file faber24a-supp.zip]
